# Supplementary material
Source: PubMed Central journal article supplement (PMC3830930)
Supplement: NIHMS523753-supplement-01.pdf [file NIHMS523753-supplement-01.pdf]

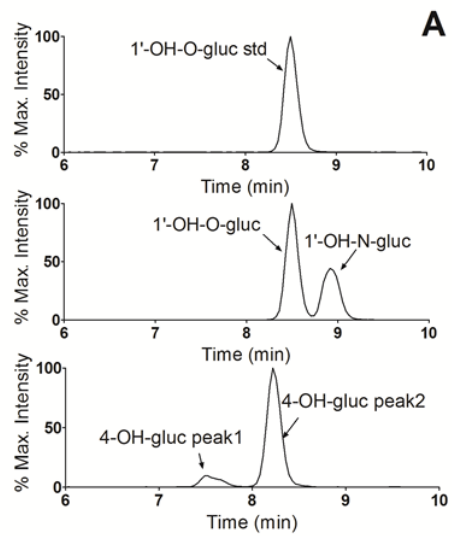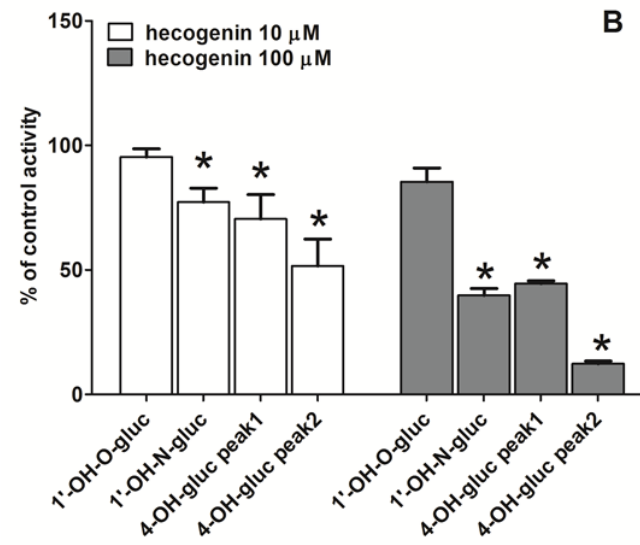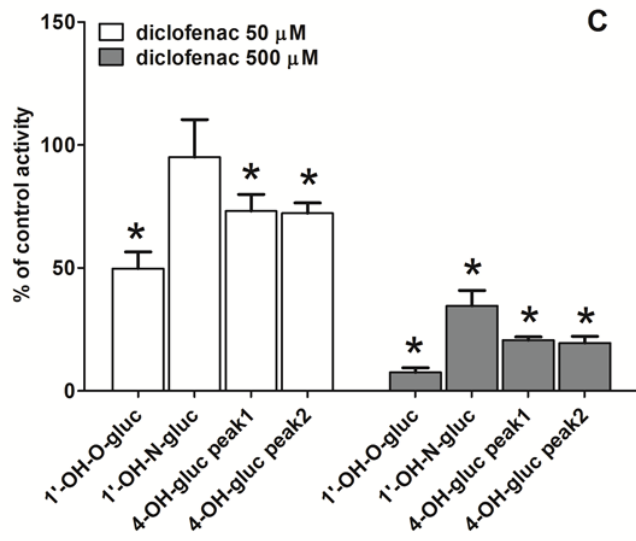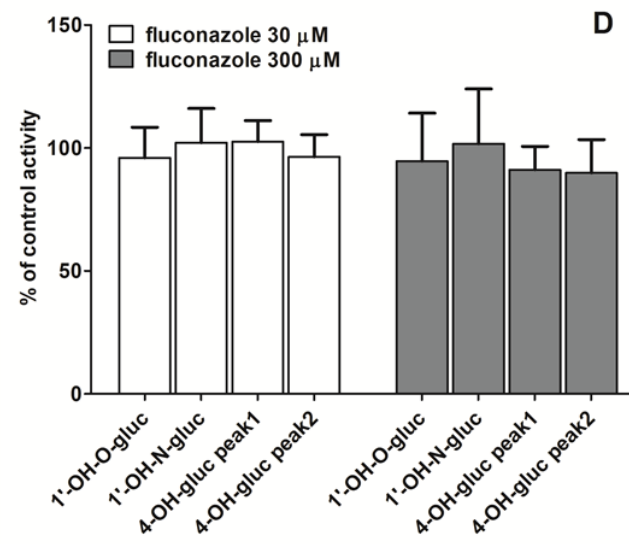

**Supplementary Figure 1. Effect of fluconazole on the formation of glucuronide conjugates of 1'-hydroxymidazolam and 4-hydroxymidazolam.** Glucuronide formation following co-incubation of 1'-hydroxymidazolam or 4-hydroxymidazolam (1  $\mu$ M) with HLM (0.75 mg/ml) at 37°C for 20 min under control conditions (A) or in the presence of hecogenin (B), diclofenac (C) and fluconazole (D). Formation of glucuronides is expressed as a percentage of control (without inhibitors). Bars and error bars represent means and S.E., respectively, of triplicate incubations. Asterisk (\*) indicates  $p < 0.05$ , compared with control.
